# Supplementary material
Source: HighWire-hosted journal article supplement (https://www.cmajopen.ca/highwire/filestream/90590/field_highwire_adjunct_files/2/open-2023-0011-original-submission.pdf)
Supplement: open-2023-0011-original-submission.pdf [file open-2023-0011-original-submission.pdf]

1  
2  
3 1 The Impact of Patient Death on Psychology, Preparedness, and Coping in Medical Training: A  
4 2 Qualitative Study  
5 3

6 4 Wen Qing Wendy Ye, MSc. M.D.<sup>1,2</sup>, Candice Griffin M.D.<sup>1,2</sup>, Irina Sverdlichenko<sup>2</sup>, Daniel  
7 5 Brandt Vegas, M.D. MHPE<sup>1,3</sup>  
8 6

9 7 <sup>1</sup>McMaster University, Hamilton, Ontario, Canada

10 8 <sup>2</sup>University of Toronto, Toronto, Ontario, Canada

11 9 <sup>3</sup>Department of Internal Medicine, St. Joseph's Hospital, Hamilton, Ontario, Canada  
12  
13  
14

15 10 Contact information for the corresponding author

16 11 Dr. Daniel Brandt Vegas: brandtd@mcmaster.ca  
17 12  
18 13

19 14 Funding: this study was generously supported by the McMaster Postgraduate Medical Education  
20 15 Research Grant awarded to WY.  
21 16

22 17 The authors have no conflicts of interest or external funding sources to disclose.  
23 18

24 19 Keywords: patient death, end of life care, physician mental health, medical culture, physician  
25 20 burnout  
26 21  
27 22  
28 23  
29 24  
30 25  
31 26  
32 27  
33 28  
34 29  
35 30  
36 31  
37 32  
38 33  
39 34  
40 35  
41 36  
42 37  
43 38  
44 39  
45 40  
46 41  
47 42  
48 43  
49 44  
50 45  
51 46  
52  
53  
54  
55  
56  
57  
58  
59  
60

1  
2  
3 47  
4 48 **ABSTRACT**  
5 49  
6 50

7 50 Background: Patient death is an inevitability of medical training. Subsequent distress, decreased  
8 51 empathy, and worse learning outcomes have been reported amongst physicians and trainees.

9 52 Early trainees often feel underprepared to manage death. We aimed to ascertain the impacts of  
10 53 patient death, perceived preparedness to manage the experience, and coping strategies employed  
11 54 by residents at a Canadian University.  
12 55

13 56 Methods: Resident physicians across various residency programs that completed an internal  
14 57 medicine rotation at McMaster University were invited to participate. Semi-structured interviews  
15 58 were conducted to understand circumstances, emotional responses, support, coping mechanisms,  
16 59 and preparedness regarding the patient death experience. Interviews were transcribed and coded  
17 60 to identify emerging themes using thematic and interpretive analysis.  
18 60  
19 61

20 62 Results: Eighteen participants were interviewed. Three main themes were categorized: 1-patient  
21 63 death circumstances; 2-immediate and delayed emotional impact; 3-preparedness and coping  
22 64 mechanisms. Pronouncing death, cardiopulmonary resuscitation, communicating with families,  
23 65 and unexpected/unknown deaths were common challenges. Feelings of guilt, helplessness, and  
24 66 grief often followed events. Feeling underprepared for the event contributed to emotional  
25 67 consequences which included difficulties sleeping, intrusive thoughts, and emotional distancing  
26 68 in subsequent deaths. While these experiences are congruent with effects of psychological  
27 68 trauma, they were consistently normalized by participants.  
28 69  
29 70

30 71 Interpretation: Patient death in medical training can be traumatic for trainees and may perpetuate  
31 72 loss of empathy, changes to practice, and residual emotional effects. Further focus is needed to  
32 73 better prepare trainees for this phenomenon and examine the culture in which physicians operate.  
33 73  
34 74

35 75 Word count: 234  
36 76  
37 77  
38 77  
39 78  
40 79  
41 80  
42 81  
43 82  
44 83  
45 84  
46 84  
47 85  
48 86  
49 87  
50 88  
51 89  
52 89  
53 90  
54 91  
55 92  
56  
57  
58  
59  
60

## INTRODUCTION

Patient death is an inevitability of medical training. The emotional impact of a patient's death on clinicians can range from an acute grief response with sadness, fear, and shock; to post traumatic stress disorder (PTSD) with hyper-vigilance, cognitive changes, sleep difficulties and emotional instability (1). For healthcare providers the death of a patient often results in guilt, fear, and powerlessness across all clinical environments (1-4). Compassion fatigue, or secondary traumatic stress, is a unique form of psychological trauma that arises from repeatedly witnessing suffering, trauma, or death, and can contribute to emotional exhaustion, depersonalization, and empathy loss (4-6). Traumatic exposures, such as the death of a patient, often occur as early in a physician's career as medical school, and can impact trainees cognitively and emotionally (7). Prior surveys have shown that medical students and internal medicine resident physicians felt that patient death experiences were often traumatic, and they felt poorly prepared to cope with these events (8, 9).

Given the potential psychological impact of witnessing death, our study aimed to explore the impact on trainees of their early experiences with a patient death, ascertain how prepared trainees feel to manage these events, and identify coping mechanisms commonly employed. The objective of our study was to further examine the immediate and delayed impacts of the patient death experience on medical trainees, potentially identifying gaps and opportunities to further support learners during difficult or traumatic events.

Word count: 234

## METHODS

A thematic and interpretative analysis approach was used to explore the impact of patient death on resident physicians and the coping mechanisms used. Interpretative thematic analysis is well suited for determining patterns of behaviour or responses amongst our participants in response to patient death (10).

Resident physicians from McMaster University, Canada, were invited to participate via email and social media in a one-on-one semi-structured interview about their experiences with patient death. Trainees of all disciplines were recruited if they had completed at least one block of internal medicine training on the Clinical Teaching Units (CTU) at one of the three main teaching hospitals in Hamilton, Ontario. Purposive sampling was used to ensure a diverse group of residents from all genders, training levels, and programs. Study recruitment continued until thematic saturation was achieved (11).

Semi-structured interviews were conducted to develop an in-depth understanding of resident experiences with patient death. Aspects of focus included the circumstances surrounding the death, empathy and personalization, impact on the resident's emotional and mental wellbeing, and coping mechanisms used. The complete interview guide can be found in Appendix A. Interviews were recorded and transcribed by a commercial transcription service (Transcript

1  
2  
3 138 Heroes transcriptheroes.ca). This study was approved by the Hamilton Integrated Research  
4 139 Ethics Board (HiREB) under protocol #5140. Psychological support services were offered to  
5 140 participants at the start of the interview, to access at any time.  
6 141

7 142 Interview transcriptions were analyzed using interpretive analysis to understand which  
8 143 patient death experiences were considered memorable, how trainees were impacted by the  
9 144 situation, how they navigated emotional responses, and coping mechanisms used. The data were  
10 145 analyzed iteratively and concurrently with data collection in a constant comparison method.  
11 146 Transcripts were independently analyzed by authors WY, CG, and DBV.  
12 147

13 148 The research team used reflexivity at every stage of the study, through acknowledging  
14 149 and discussing how investigators 'personal experiences may have impacted data interpretation.  
15 150 All disagreements were resolved by consensus at biweekly research meetings. DBV is a General  
16 151 Internist and clinician educator at McMaster University. He has a clinical focus in end of life  
17 152 care and medical assisted death, and supervises learners in the inpatient and outpatient Internal  
18 153 Medicine service at St Joseph's Healthcare Hamilton, Ontario. CG is a Critical Care fellow at the  
19 154 University of Toronto who completed her Internal Medicine training at McMaster University.  
20 155 She has an interest in communication and interpersonal dynamics in medicine. WY is a  
21 156 Nephrology fellow at the University of Toronto who also completed her Internal Medicine  
22 157 Training at McMaster University. She has an interest in medical education and qualitative  
23 158 research methods. IS is currently a medical student at the University of Toronto.  
24 159

## 25 160 **RESULTS**

26 161

27 162 Eighteen participants were interviewed. The mean age of participants was 27 years. The  
28 163 majority (55% percent) of trainees were in their first year of residency, with 29% of participants  
29 164 from Family Medicine and 22% from Internal Medicine. Other disciplines included Radiology,  
30 165 Pathology, Psychiatry, General Surgery, Obstetrics and Gynecology, and Radiation Oncology.  
31 166 Most (72%) of participants had experienced their first patient death during medical school. A  
32 167 summary of participant demographics can be found in Table 1.  
33 168

34 169 Memorable patient death scenarios included unexpected deaths in which the patient  
35 170 deteriorated suddenly, pronouncing death for the first time while on call, cardiopulmonary  
36 171 resuscitations, and meaningful or challenging family interactions around the time of the patient's  
37 172 death. The most common response to patient death was sadness, shock, and helplessness,  
38 173 regardless of the cited circumstance.  
39 174

40 175 *"I remember feeling sad...like I was going to cry after both [patient deaths], even though [I did*  
41 176 *not have] some deep relationship or connection to each of the patients, it was just such a wild*  
42 177 *experience to see a person who has died."* (P11)  
43 178

44 179 During unexpected deaths participants described feeling shock and guilt that the patient  
45 180 clinically deteriorated, and often wondered if their own performance negatively influenced the  
46 181 patient's trajectory.  
47

1  
2  
3 182  
4  
5 183 *“Because it was unexpected, I definitely felt guilty because I [wondered] was there something I*  
6 184 *could have done to prevent this.”* (P12)  
7 185

8 186 While pronouncing a death on overnight call, participants reported feeling unqualified  
9 187 and unprepared to perform the task.  
10 188

11 189 *“I’m reading [in the McMaster Internal Medicine handbook] about how to pronounce a patient’s*  
12 190 *death as I’m going to do it. Like this is the potentially most significant thing in the life of his*  
13 191 *family... Who am I to come and pronounce somebody dead? Am I even medically competent*  
14 192 *enough?”* (P11).  
15 193

16 194 Cardiopulmonary resuscitations often precipitated feelings of anxiety and distress due to  
17 195 the intensity of the situation. When recalling family interactions, participants were at times  
18 196 conflicted by family dynamics (especially if there was opposition to the patient’s previously  
19 197 defined wishes) or saddened by the family’s experience of loss.  
20 198

21 199 *“I think it was mostly shock and fear for this patient. And a sense of derealisation – like this can’t*  
22 200 *be how the story is playing out. When his wife came I felt so much pain for her. I thankfully had*  
23 201 *a call room, right on the floor that was about 12 steps away, and the moment I got in there I*  
24 202 *burst into tears.”* (P14)  
25 203

26 204 Immediately following the death, both distraction and reflective techniques were used as  
27 205 coping strategies, and participants often discussed the experience with fellow residents and  
28 206 family members. Distraction techniques included exercise, video games, unhealthy eating, and  
29 207 occasionally alcohol; whereas, reflective techniques included journaling, writing letters to the  
30 208 patient or their families (which were never sent), and studying around the physiology and  
31 209 medical management of the case. Some participants had debriefs with the staff or senior resident  
32 210 immediately after the event, and those that debriefed felt this was helpful to process their  
33 211 emotional reaction to the situation.  
34 212

35 213 *“Certainly I think there’s a big temptation to distract yourself with something unrelated...to*  
36 214 *watch TV or a movie or play video games. It can help for a time. But I think that if you’re using it*  
37 215 *to avoid emotions that you haven’t fully explored yet, that’s probably not the best thing. But if it’s*  
38 216 *something that’s just too painful for you to think about and you need something to take your mind*  
39 217 *off it, then I think that’s a perfectly reasonable coping strategy.”* (P6)  
40 218

41 219 *“Journaling helps because it gives me a structured way to reflect on things. Once I put it in*  
42 220 *writing [it solidifies] this is actually how I was feeling at that time.”* (P8)  
43 221

44 222 Participants unanimously reported that their patient death experience was difficult for  
45 223 them. Trainees often ruminated on how they could have managed the patient differently to  
46  
47  
48  
49  
50  
51  
52  
53  
54  
55  
56  
57  
58  
59  
60

1  
2  
3 224 achieve a more favourable outcome, and many reported difficulties sleeping and mood changes  
4 225 following the event.  
5

6 226  
7  
8 227 *"[After the patient died] there was something at the back of my mind, but I still did everything*  
9 228 *normally. When I went home though is when it started to really hit me. I was telling my family*  
10 229 *[about it] and then I broke down on the phone."* (P10)  
11 230

12 231 During subsequent call shifts or clinical exposure participants endorsed feeling nervous  
13 232 of managing similar patients and as a result were hyper-vigilant. Some participants actively  
14 233 avoided similar cases, opting to choose other types of patients to round on, or consciously  
15 234 distanced themselves emotionally from patients that reminded them of the patient who died  
16 235 previously.  
17 236

18 237 *"[The death] played on my mind, feelings of guilt, like what could I have done differently? What*  
19 238 *happened? It was a hard situation that was playing in the back of my mind and definitely made*  
20 239 *me more anxious on my next few calls."* (P12)  
21 240

22 241 Over time, many participants experienced depersonalization and loss of empathy with  
23 242 repeated exposure to patient death, which was accompanied by a sense of guilt regarding their  
24 243 perceived lack of compassion.  
25 244

26 245 *"I don't feel as affected as much anymore. I don't think I've cried since that time. It's an*  
27 246 *unconscious detachment...I don't let myself go into that mental space where I think about the*  
28 247 *family members and what they're feeling. I do feel bad about it. There's an element of guilt. But*  
29 248 *then I rationalize it to myself that this is a defensive mechanism."* (P1)  
30 249

31 250 Two participants reported that the patient death prompted an avoidance of fields with  
32 251 similar patient populations, leading to alternative career paths.  
33 252

34 253 *"I think [the patient's death] impacted the direction that I want my career to take...I think it's*  
35 254 *impacted my interest where I now have no interest in [obstetrics]."* (P16)  
36 255

37 256 Unanimously, participants normalized their experiences with patient death, and did not  
38 257 believe the emotional impacts were long standing. Witnessing death was perceived as a  
39 258 necessary component of medical training and central to the role of a physician; many endorsed  
40 259 this with a sense of resignation.  
41 260

42 261 *"I think [the patient's death] put everything into check. It's like OK, you're doing medicine. This*  
43 262 *is a part of it. In my head, I think I digested it as...this is a part of the [training] process."* (P8)  
44 263

45 264 *"[The Senior Medical Resident] knew in a way what I was going through because I think*  
46 265 *everyone eventually goes through [a profound patient death] at some point."* (P15)  
47 266

1  
2  
3 267 Most of the participants further reported feeling underprepared with respect to prior  
4 268 training and education to manage and cope with death.  
5 269

7 270 *“No one teaches you how to disentangle from the emotional aspects of a patient dying...I’ve*  
8 271 *always thought that it might be nice in medical school to have a discussion about thoughts and*  
9 272 *feelings surrounding patient death and other difficult situations that you encounter in residency.*  
11 273 *Nobody tells you that these are going to happen and how to deal with them. They just come up*  
12 274 *and you’re just expected to deal with them based on the [life] skills that you’ve developed.” (P18)*  
13

## 14 275

### 15 276 **INTERPRETATION**

## 16 277

17 278 Our study captures the patient death experiences of 18 McMaster resident physicians.  
18 279 Patient deaths that were the most memorable involved unexpected deaths, first time death  
19 280 pronouncement while on call, cardiopulmonary resuscitation leading to death, and challenging  
20 281 family dynamics surrounding the death. Participants experienced feelings of guilt, fear, worry,  
21 282 shock, and sadness, which were accompanied at times by difficulties sleeping, rumination on  
23 283 their role in the patient’s care, hyper-vigilance on future shifts, avoidance of similar cases,  
24 284 empathy loss with repeated exposure to death, and even career changes into alternative clinical  
25 285 specialties. Participants unanimously normalized these experiences, and felt underprepared to  
26 286 cope with these feelings.  
27 287

28 288 The emotional and behavioural responses described by participants are congruent with  
29 289 acute grief and psychological trauma, which is defined as emotional, cognitive, behavioural and  
30 290 physical responses to a stressful event (1, 12-14). While more experienced physicians have  
31 291 reported acute grief responses to a patient’s death, they require less psychological and emotional  
32 292 support than trainees presumably due to the development of adaptive coping mechanisms over  
33 293 time (15). Impacts on trainees can persist, as a previous randomized controlled trial found that  
34 294 medical trainees exposed to an unexpected patient death in a simulated setting reported an  
35 295 increase in cognitive load during the exercise and worse learning outcomes three months later  
36 296 (7).  
37 297

38 298 Despite empathy playing a central role in physician identity, participants in our study  
39 299 describe a reduction in empathy towards patients with repeated death experiences. A systematic  
40 300 review found a self-perceived decline in empathy throughout medical training amongst trainees,  
41 301 with higher rates occurring during the clinical years where learners are involved in direct patient  
42 302 care (16). A study of trainees rotating through a medical oncology ward reported a decline in  
43 303 empathy that was associated with repeatedly witnessing patient deaths (17), and medical students  
44 304 have described using empathy loss as a self-identified coping mechanism after experiencing  
45 305 patient death early in training (18). This loss of empathy represents a stark discordance to the  
46 306 professional and societal expectations of physicians to provide patients with empathetic and  
47 307 compassionate care.  
48 308

49 309 Difficult situations that lead to psychological distress and trauma are often associated  
50 310 with unexpected events and the perception of loss of control during the scenario (19). Both  
51  
52  
53  
54  
55  
56  
57  
58  
59  
60

1  
2  
3 311 human and animal studies have shown that when a subject is given control over a stressful  
4 312 stimulus (for example the ability to change or stop the stimulus) there is a decrease in fear and  
5 313 stress (19-21). Furthermore, perceived self-efficacy and the ability to impact an outcome further  
6 314 attenuates trauma responses, and has been shown to biochemically reduce the level of circulating  
7 315 catecholamines and psychologically lower distress (22, 23). Bolstering coping mechanisms  
8 316 through the use of psychological interventions such as cognitive behavioural therapy to deal with  
9 317 traumatic situations prior to exposure has been shown to reduce psychological trauma, and may  
10 318 be beneficial amongst professionals at risk of post-traumatic stress (19, 24). In our study,  
11 319 participants unanimously reported feeling unprepared to deal with the death of a patient, with  
12 320 many citing unexpected deaths and the fear that their own actions may have impacted the  
13  
14 321 trajectory of the patient's decline as the most distressing part of the patient death experience. In  
15 322 addition to advancing clinical acumen and medical knowledge, programs that focus on how to  
16 323 cope with and manage unexpected patient deaths may reduce trainees' psychological distress in  
17 324 the clinical setting, although more research is needed to validate such interventions.  
18 325

19 326 There are some limitations with our study. Through specifically inquiring about  
20 327 memorable patient deaths, we may have introduced selection bias by recruiting trainees that had  
21 328 more traumatic experiences. To minimize this bias, recruitment materials simply inquired about  
22 329 patient death experiences to maintain neutrality, in an attempt to also explore positive scenarios.  
23 330 While the more memorable circumstances may not fully represent non-traumatic death  
24 331 exposures, the traumatic experiences may better identify gaps and opportunities to improve  
25 332 learner support. Finally, our study recruited participants solely from McMaster University in  
26 333 Ontario, Canada, and may not be fully generalizable to the experiences of trainees at other  
27 334 residency training programs or hospital sites. There may be educational programs already in  
28 335 place at other institutions that focus on developing coping strategies for patient death  
29 336 experiences. Despite the heterogeneity of our participant population, patient death experiences  
30 337 amongst participants were universal.  
31 338

32 339 Overall, the death of a patient can be a traumatic experience for medical trainees, and  
33 340 may be associated with acute grief and psychological stress. Repeated exposure leads to  
34 341 depersonalization and empathy loss. While the professional expectation of physicians is to  
35 342 provide compassionate, empathetic patient care, traumatic experiences during medical training  
36 343 may negatively impact this over time through empathy loss and compassion fatigue. Educational  
37 344 initiatives to prepare trainees for these experiences and teach adaptive coping strategies may help  
38 345 mitigate psychological trauma and empathy loss, although further research is required to explore  
39 346 these strategies.  
40 347

41 348 Word count: 793

42 349  
43 350 Total word count: 2621

## 44 351 **ACKNOWLEDGEMENTS**

45 352 The authors would like to extend a thank you to the program administrators for their  
46 353 assistance in recruitment for this study. We would also like to thank the resident trainees who  
47 354 shared their stories for the purpose of this study.  
48 355



1  
2  
3 3564 357 **FUNDING AND SUPPORT**5 358 This study was generously supported by the McMaster Postgraduate Medical Education  
6 359 Research Grant awarded to WY.

7 360

8 361 **OTHER DISCLOSURES**

9 362 None.

10 363

11 364 **REFERENCES**

12 365

- 13 366 1. Granek L, Bartels U, Scheinmann K, Labrecque M, Barrera M. Grief reactions and impact  
14 367 of patient death on pediatric oncologists. *Pediatr Blood Cancer*. 2015;62(1):134-42.
- 15 368 2. Belling C. Haunted Doctors. *Perspect Biol Med*. 2020;63(3):466-79.
- 16 369 3. Giddings G. The ties that bind: a reflection on physician grief. *Support Care Cancer*.  
17 370 2010;18(10):1355-7.
- 18 371 4. Hayuni G, Hasson-Ohayon I, Goldzweig G, Bar Sela G, Braun M. Between empathy and  
19 372 grief: The mediating effect of compassion fatigue among oncologists. *Psychooncology*.  
20 373 2019;28(12):2344-50.
- 21 374 5. Cieslak R, Shoji K, Douglas A, Melville E, Luszczynska A, Benight CC. A meta-analysis of  
22 375 the relationship between job burnout and secondary traumatic stress among workers with  
23 376 indirect exposure to trauma. *Psychol Serv*. 2014;11(1):75-86.
- 24 377 6. Alharbi J, Jackson D, Usher K. The potential for COVID-19 to contribute to compassion  
25 378 fatigue in critical care nurses. *J Clin Nurs*. 2020;29(15-16):2762-4.
- 26 379 7. Fraser K, Huffman J, Ma I, Sobczak M, Mellwrick J, Wright B, et al. The emotional and  
27 380 cognitive impact of unexpected simulated patient death: a randomized controlled trial.  
28 381 *Chest*. 2014;145(5):958-63.
- 29 382 8. Hull FM. Death, dying and the medical student. *Med Educ*. 1991;25(6):491-6.
- 30 383 9. Williams CM, Wilson CC, Olsen CH. Dying, death, and medical education: student voices. *J*  
31 384 *Palliat Med*. 2005;8(2):372-81.
- 32 385 10. Watling CJ, Lingard L. Grounded theory in medical education research: AMEE Guide No.  
33 386 70. *Med Teach*. 2012;34(10):850-61.
- 34 387 11. Malterud K, Siersma VD, Guassora AD. Sample Size in Qualitative Interview Studies:  
35 388 Guided by Information Power. *Qual Health Res*. 2016;26(13):1753-60.
- 36 389 12. Keene EA, Hutton N, Hall B, Rushton C. Bereavement debriefing sessions: an intervention  
37 390 to support health care professionals in managing their grief after the death of a patient.  
38 391 *Pediatr Nurs*. 2010;36(4):185-9; quiz 90.
- 39 392 13. Buxton H, Marr MC, Hernandez A, Vijanderan J, Brasel K, Cook M, et al. Peer-to-Peer  
40 393 Trauma-Informed Training for Surgical Residents Facilitated by Psychiatry Residents. *Acad*  
41 394 *Psychiatry*. 2022.
- 42 395 14. Foli KJ, Reddick B, Zhang L, Krcelich K. Nurses' psychological trauma: "They leave me  
43 396 lying awake at night". *Arch Psychiatr Nurs*. 2020;34(3):86-95.
- 44 397 15. Redinbaugh EM, Sullivan AM, Block SD, Gadmer NM, Lakoma M, Mitchell AM, et al.  
45 398 Doctors' emotional reactions to recent death of a patient: cross sectional study of hospital  
46 399 doctors. *BMJ*. 2003;327(7408):185.

- 1  
2  
3 400 16. Neumann M, Edelhäuser F, Tauschel D, Fischer MR, Wirtz M, Woopen C, et al. Empathy  
4 401 decline and its reasons: a systematic review of studies with medical students and residents.  
5 402 Acad Med. 2011;86(8):996-1009.  
6  
7 403 17. McFarland DC, Malone AK, Roth A. Acute empathy decline among resident physician  
8 404 trainees on a hematology-oncology ward: an exploratory analysis of house staff empathy,  
9 405 distress, and patient death exposure. *Psychooncology*. 2017;26(5):698-703.  
10 406 18. Smith-Han K, Martyn H, Barrett A, Nicholson H. That's not what you expect to do as a  
11 407 doctor, you know, you don't expect your patients to die." Death as a learning experience for  
12 408 undergraduate medical students. *BMC Med Educ*. 2016;16:108.  
13 409 19. Whealin JM, Ruzek JI, Southwick S. Cognitive-behavioral theory and preparation for  
14 410 professionals at risk for trauma exposure. *Trauma Violence Abuse*. 2008;9(2):100-13.  
15 411 20. Mineka S, Zinbarg R. A contemporary learning theory perspective on the etiology of anxiety  
16 412 disorders: it's not what you thought it was. *Am Psychol*. 2006;61(1):10-26.  
17 413 21. Geer JH, Maisel E. Evaluating the effects of the prediction-control confound. *J Pers Soc*  
18 414 *Psychol*. 1972;23(3):314-9.  
19 415 22. Bandura A, Taylor CB, Williams SL, Mefford IN, Barchas JD. Catecholamine secretion as a  
20 416 function of perceived coping self-efficacy. *J Consult Clin Psychol*. 1985;53(3):406-14.  
21 417 23. King DW, King LA, Foy DW, Keane TM, Fairbank JA. Posttraumatic stress disorder in a  
22 418 national sample of female and male Vietnam veterans: risk factors, war-zone stressors, and  
23 419 resilience-recovery variables. *J Abnorm Psychol*. 1999;108(1):164-70.  
24 420 24. Qi W, Gevonden M, Shalev A. Prevention of Post-Traumatic Stress Disorder After Trauma:  
25 421 Current Evidence and Future Directions. *Curr Psychiatry Rep*. 2016;18(2):20.  
26 422

## 423 TABLES AND FIGURES

424  
425 Table 1: Participant Demographics

| Participant | Age | Program            | Year of Training | Occurrence of First Patient Death | Previous Personal Exposure to Death (Y/N) |
|-------------|-----|--------------------|------------------|-----------------------------------|-------------------------------------------|
| 1           | 33  | Internal Medicine  | 3                | Residency                         | Y                                         |
| 2           | 26  | Internal Medicine  | 1                | Residency                         | Y                                         |
| 3           | 27  | Obstetrics         | 2                | Medical School                    | Y                                         |
| 4           | 24  | Internal Medicine  | 1                | Medical School                    | Y                                         |
| 5           | 25  | Internal Medicine  | 1                | Medical School                    | --                                        |
| 6           | 29  | Radiation Oncology | 1                | Residency                         | Y                                         |
| 7           | 28  | Psychiatry         | 2                | Residency                         | Y                                         |

|    |    |                   |   |                |   |
|----|----|-------------------|---|----------------|---|
| 8  | 27 | General Pathology | 4 | Medical School | N |
| 9  | 30 | General Surgery   | 2 | Medical School | N |
| 10 | 25 | Radiology         | 1 | Medical School | Y |
| 11 | 25 | Family Medicine   | 1 | Medical School | Y |
| 12 | 27 | Family Medicine   | 1 | Residency      | Y |
| 13 | 27 | Psychiatry        | 1 | Medical School | Y |
| 14 | 24 | Family Medicine   | 2 | Medical School | N |
| 15 | 28 | Radiology         | 2 | Medical School | Y |
| 16 | 28 | Family Medicine   | 1 | Medical School | Y |
| 17 | 26 | Family Medicine   | 1 | Medical School | Y |
| 18 | 37 | General Pathology | 4 | Medical School | Y |

## APPENDIX

### Supplemental Data: Semi-Structured Interview Guide

#### Demographics

1. What year of residency are you in?
2. What residency program are you in?
3. How old are you?
4. When during your medical training did you have your first experience with a patient's death?
5. Did you have a personal or professional experience with death prior to starting medical school?

#### Interview Questions

1. Please describe your first experience with a patient's death during medical training.

1  
2  
3  
4  
5  
6  
7  
8  
9  
10  
11  
12  
13  
14  
15  
16  
17  
18  
19  
20  
21  
22  
23  
24  
25  
26  
27  
28  
29  
30  
31  
32  
33  
34  
35  
36  
37  
38  
39  
40  
41  
42  
43  
44  
45  
46  
47  
48  
49  
50  
51  
52  
53  
54  
55  
56  
57  
58  
59  
60

- 443 a. How involved were you with the care of this patient?
- 444 b. How much time did you spend caring for the patient?
- 445 c. What were the circumstances surrounding the death? (ex. planned, expected,  
446 unexpected, medical error)
- 447 d. What was your role before and after the patient's death?
- 448 e. Did you speak with the family of the patient?
- 449 f. Were you present at the time of death? Were you involved in pronouncing the  
450 death?
- 451 g. Was there a specific/formal conversation or discussion about this patient's death?
- 452 h. Who was involved in this conversation? What did it entail? How was it useful?
- 453 i. What would you have changed about it?
- 454 j. Did you talk about this experience with someone else outside from work? Who?  
455 How was it useful?
- 456 2. How did this experience with patient death impact you?
- 457 a. For example, did it impact your learning, ability to provide patient care, mental  
458 health, work?
- 459 b. Did this experience affect any of your personal relationships?
- 460 3. Did you feel like the training you received prepared you for this experience?
- 461 4. What kind of things would have made this experience more positive?
- 462 5. Did you use any specific strategies or resources to cope with the death of the patient?
- 463 a. Which resources were you aware of within or outside of PGME at McMaster?
- 464 b. Were you concerned about any of the strategies you utilized?
- 465 c. Were there any other activities that you found helpful when dealing with a  
466 patient's death? – e.g. some people focus on hobbies, cooking, exercise, etc.
- 467 6. Can you think of another experience with a patient's death that stands out? Was this  
468 experience affected by the first one?
- 469 7. Did the policy changes with COVID-19 (protected code blues with minimal junior  
470 learners in room, no visitor's policy) impact your experiences with patient death?
- 471 8. Any other comments?
